# Supplementary material for: Flame resistant cotton lines generated by synergistic epistasis in a MAGIC population
Source: PLoS One. 2023 Jan 18;18(1):e0278696. doi: 10.1371/journal.pone.0278696 (PMC9847967; doi:10.1371/journal.pone.0278696)
Supplement: S4 Table — (XLSX) [file pone.0278696.s006.xlsx]

## Sheet: TableS4
Table S4. List of SNPs that were present in the four FR lines that produced self-extinguishing fabric, but absent from the most flammable RILs.
Chromosome	Position
A03	5708720
A03	5823819
A03	6256918
A03	6680690
A03	6690522
A03	6693236
A03	6698933
A03	6734869
A03	6734920
A03	6742133
A03	6765015
A03	6771179
A03	6824144
A03	6838884
A03	6842469
A03	6842479
A03	6846721
A03	6846893
A03	6850752
A03	6853135
A03	6854591
A03	6856623
A03	6857528
A03	6861323
A03	6861371
A03	6862936
A03	6865610
A03	6867402
A03	6867736
A03	6868480
A03	6875967
A03	6876021
A03	6876499
A03	6877188
A03	6877635
A03	6877698
A03	6877880
A03	6878111
A03	6878957
A03	6879023
A03	6879395
A03	6879483
A03	6879713
A03	6879986
A03	6881086
A03	6881204
A03	6881468
A03	6881944
A03	6882201
A03	6882300
A03	6882894
A03	6884898
A03	6886252
A03	6886422
A03	6886947
A03	6888068
A03	6888698
A03	6888786
A03	6890580
A03	6892138
A03	6892504
A03	6892852
A03	6892877
A03	6893131
A03	6893188
A03	6893376
A03	6893994
A03	6896731
A03	6897565
A03	6899453
A03	6900431
A03	6900490
A03	6900789
A03	6902249
A03	6902252
A03	6903158
A03	6903892
A03	6903993
A03	6904071
A03	6904877
A03	6906291
A03	6906553
A03	6907010
A03	6911212
A03	6911358
A03	6911620
A03	6920814
A03	6923538
A03	6937890
A04	60888988
A04	60888996
A05	3588189
A05	4051692
A05	4059890
A05	4068742
A05	4737069
A05	4740418
A05	4768393
A05	78343082
A05	84800136
A07	40079908
A07	40287647
A07	40738336
A07	40762776
A07	41096413
A07	41674720
A07	41710686
A07	42000638
A07	43055956
A07	77984544
A08	77973999
A08	78010327
A08	78023934
A08	78282206
A08	78300739
A08	78345590
A08	78346512
A08	78359913
A08	78592630
A08	78640703
A08	78744259
A08	78853044
A08	78889162
A08	78913158
A08	78949687
A08	79145063
A08	79168219
A08	79171098
A08	79171879
A08	79186693
A08	79259460
A08	79298663
A08	79300705
A08	79305482
A08	79308066
A08	79308779
A08	79312403
A08	79316956
A08	79318073
A08	79331207
A08	79333026
A08	79333691
A08	79334873
A08	79334976
A08	79336454
A08	79338379
A08	79340935
A08	79340979
A08	79343684
A08	79349724
A08	79350622
A08	79350790
A08	79353809
A08	79357483
A08	79357501
A08	79362550
A08	79364036
A08	79364798
A08	79368072
A08	79368356
A08	79382867
A08	79384507
A08	79385314
A08	79389256
A08	79390188
A08	79392633
A08	79395237
A08	79395642
A08	79404345
A08	79417259
A08	79423220
A08	79423910
A08	79425622
A08	79436250
A08	79437352
A08	79439990
A08	79442208
A08	79443660
A08	79451658
A08	79454589
A08	79462073
A08	79462229
A08	79464582
A08	79464672
A08	79469800
A08	79471390
A08	79473209
A08	79478512
A08	79480381
A08	79481223
A08	79481846
A08	79482570
A08	79542184
A08	79542394
A08	79545865
A08	79548242
A08	79549758
A08	79550172
A08	79551681
A08	79553703
A08	79557076
A08	79557577
A08	80708116
A08	81182218
A08	81287386
A08	94426306
A08	94509447
A08	94509457
A08	99514130
A11	18910523
A12	62421087
A13	3744505
A13	3747901
A13	6354044
A13	6375006
A13	6380898
A13	6380906
A13	6383662
A13	6383721
A13	6387538
A13	6393652
A13	6394123
A13	6396028
A13	6400101
A13	6400312
A13	6400491
A13	6400891
A13	6400945
A13	6401206
A13	6402285
A13	6403090
A13	6404269
A13	6404302
A13	6409064
A13	6419275
A13	6421899
A13	6427819
A13	6429253
A13	6429298
A13	6429988
A13	6431806
A13	6436763
A13	6442302
A13	6442627
A13	6447142
A13	6447765
A13	6460297
A13	6465412
A13	6466323
A13	6467400
A13	6468813
A13	6479795
A13	6480969
A13	6481132
A13	6481159
A13	6481168
A13	6481593
A13	6481754
A13	6481978
A13	6482217
A13	6506271
A13	6506985
A13	6507068
A13	6507721
A13	6508844
A13	6509698
A13	6510949
A13	6515120
A13	6515179
A13	6515817
A13	6516667
A13	6517859
A13	6518744
A13	6518903
A13	6520121
A13	6521668
A13	6524922
A13	6527375
A13	6530611
A13	6531362
A13	6537288
A13	6537464
A13	6538110
A13	6538400
A13	6541471
A13	6542594
A13	6546023
A13	6546418
A13	6550198
A13	6550945
A13	6554065
A13	6554279
A13	6555745
A13	6557486
A13	6557927
A13	6558378
A13	6565327
A13	6567444
A13	6574073
A13	6575821
A13	6576004
A13	6577911
A13	6584519
A13	6586773
A13	6589066
A13	6589238
A13	6589299
A13	6591133
A13	6592526
A13	6595551
A13	6598110
A13	6599244
A13	6599694
A13	6602325
A13	6603986
A13	6671218
A13	6708965
A13	6734733
A13	6736719
A13	6761240
A13	6966856
A13	6975988
A13	6996553
A13	6997336
A13	7060107
A13	7115693
A13	7360499
A13	7379131
A13	7648466
A13	7667717
A13	7680608
A13	7889928
A13	8041706
A13	8102525
A13	8122042
A13	8228601
A13	8230323
A13	8531402
A13	8566075
A13	8740490
A13	8795168
A13	8821521
A13	29611816
A13	29879692
A13	31132925
A13	33390824
A13	35231785
A13	35231810
D03	394999
D03	37384858
D04	5848483
D04	46993343
D04	47006842
D05	55990074
D05	55996751
D05	56180253
D05	59398226
D05	59858273
D05	59867477
D05	61042649
D05	61042842
D05	61044895
D05	61044921
D05	61063494
D05	61066953
D05	61079257
D05	61079345
D05	61079483
D05	61081582
D05	61083882
D05	61085089
D05	61405095
D05	61464131
D05	61468943
D05	61469183
D05	61471865
D05	61475133
D05	61477515
D05	61480651
D05	61538606
D05	61540107
D05	61550221
D05	61553611
D05	61553942
D05	61570681
D05	61582040
D05	61641034
D05	61684476
D05	61685778
D06	15200276
D07	11420707
D07	12155599
D07	41327734
D07	41844513
D07	48419020
D09	6832159
D09	6832206
D09	6832208
D09	6832220
D10	61215056
D10	61303335
D10	61373384
D10	61584825
D12	3731310
D12	3731343
D12	3733710
